# Supplementary material
Source: Springer Nature journal article supplement (https://www.springermedizin.de/resource/supplementary/13054_2010_8499_MOESM1_ESM.pdf/9732108)
Supplement: MOESM1 [file 9732108]

Assessed for eligibility (n=215)

Inclusion criteria no fulfilled (n= 92)

Failure to obtain consent (n=3)

Randomized (n=120)

Allocated to Vigileo group (n=60)

Allocated to Control group (n=60)

Surgical procedure not performed (n=9)

- 3 vascular anastomosis not possible
- 3 peritoneal cancer disease
- 3 inoperable tumor of pancreas

Surgical procedure not performed (n=6)

- 4 vascular anastomosis not possible
- 2 inoperable tumor of pancreas

Analysed:  
60 patients postoperative outcome  
51 patients intraoperatively and biochemistry

1 patient died, 1 needed reoperation till day 30  
and 2 patients were rehospitalized

Analysed:  
60 patients postoperative outcome  
54 patients intraoperatively and biochemistry

2 patients died, 6 reoperations on 5 patients  
were performed till day 30 and 6 patients were  
rehospitalized
